# Supplementary material
Source: PubMed Central journal article supplement (PMC3383595)
Supplement: cc-11-2359-s07.pdf [file cc-11-2359-s07.pdf]

## **Supplemental Material to:**

**Suranjana Mukherjee, J. Daniel Diaz Valencia, Shannon Stewman, Sylvain Monnier, Uttama Rath, Ana B. Asenjo, Rabab A. Charafeddine, Hernando J. Sosa, Jennifer Ross, Ao Ma and David J. Sharp**

**Human Fidgetin is a microtubule severing the enzyme and minus-end depolymerase that regulates mitosis**

**2012; 11(12)**

**<http://dx.doi.org/10.4161/cc.20849>**

**<http://www.landesbioscience.com/journals/cc/article/20849>**

Figure S1

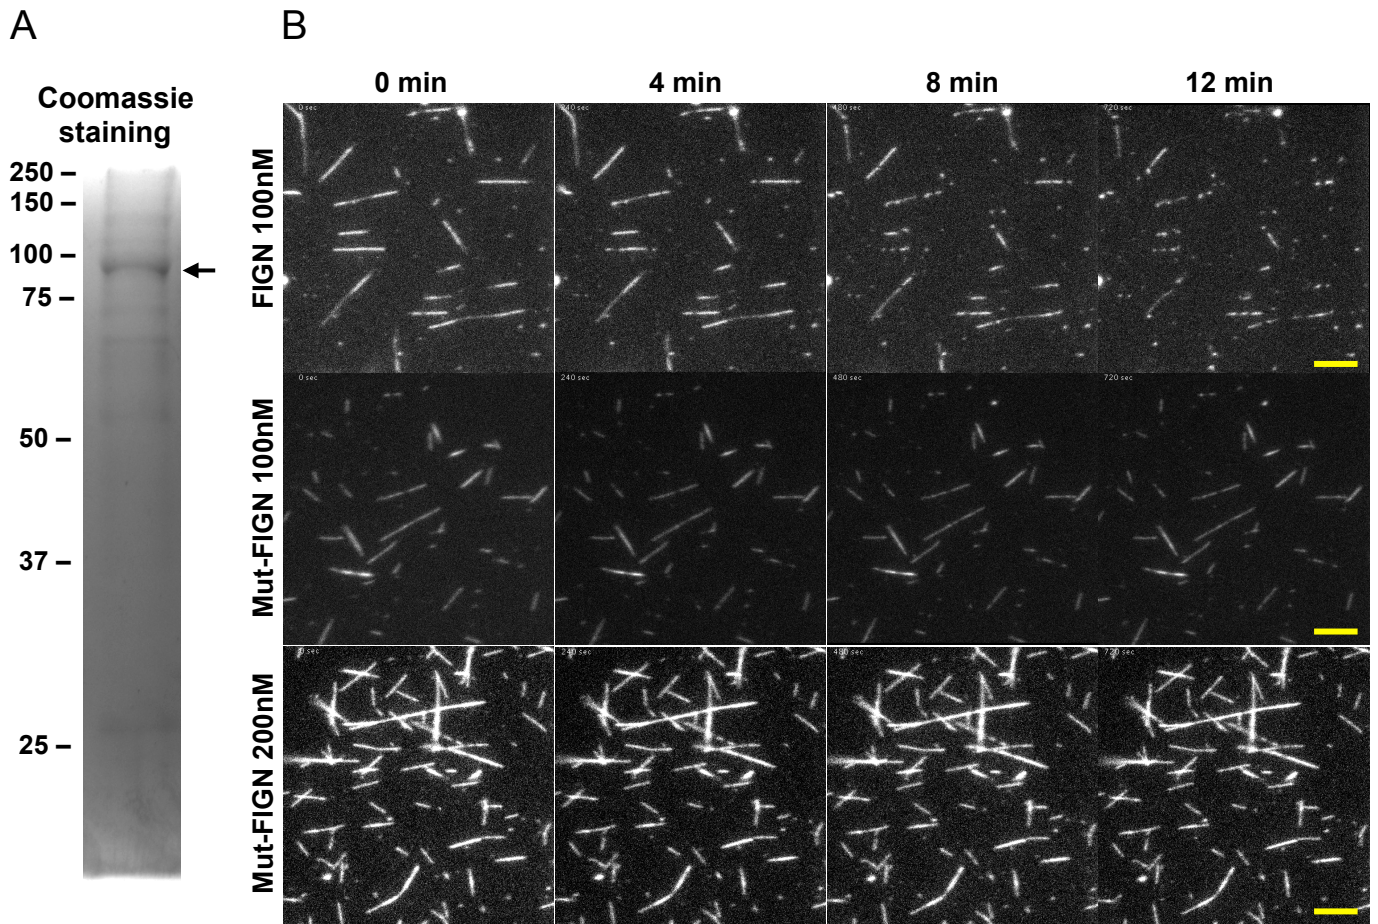

# Figure S2

A

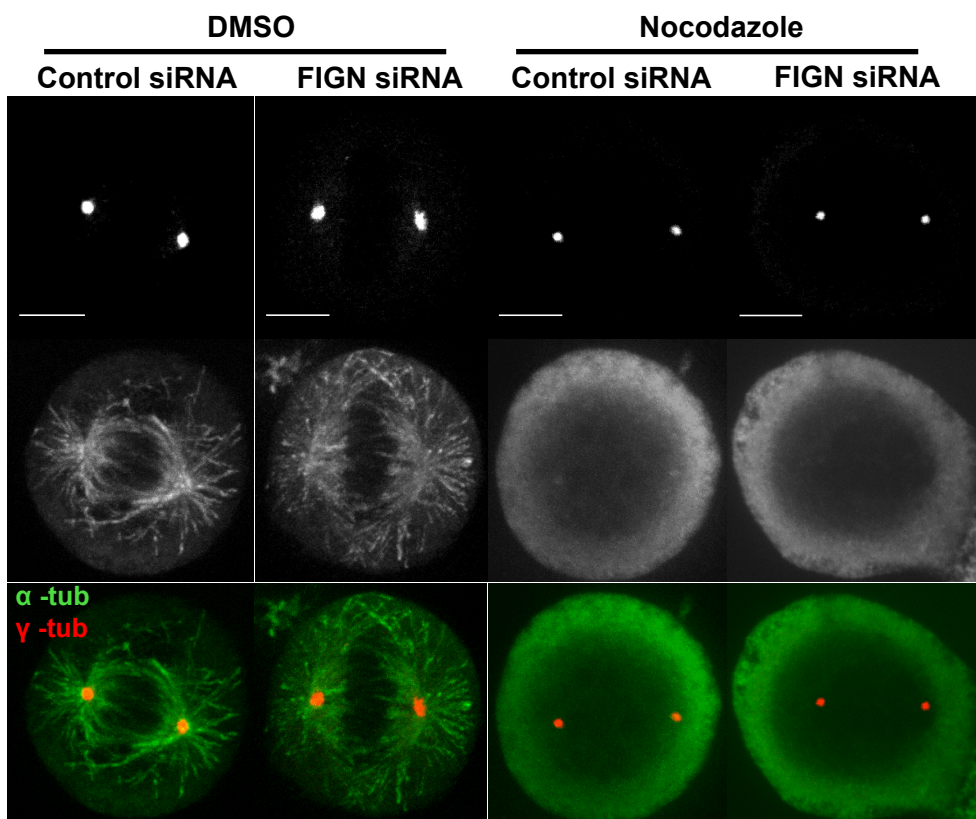

B

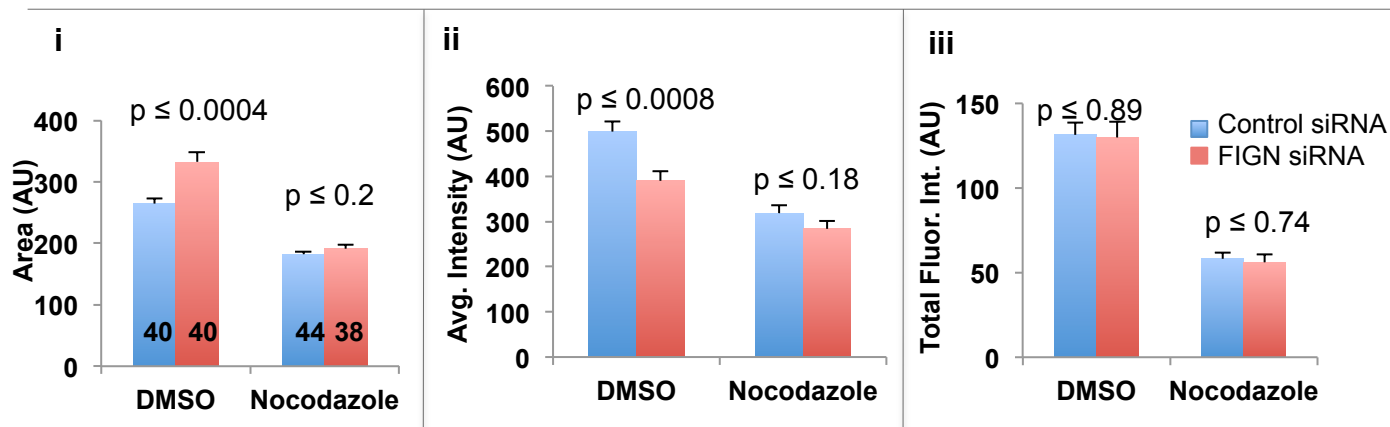

**Figure S3**

**A**

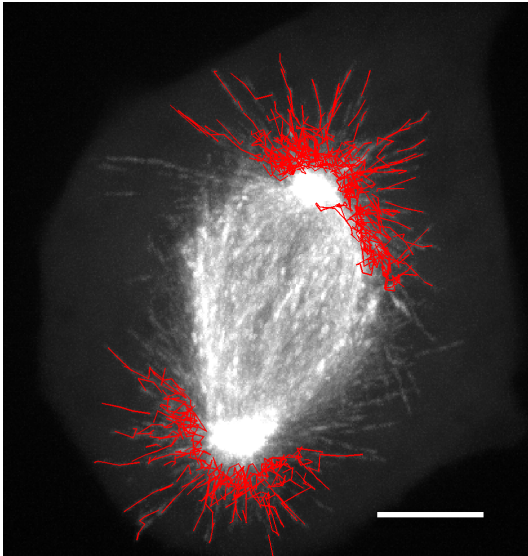

**B**

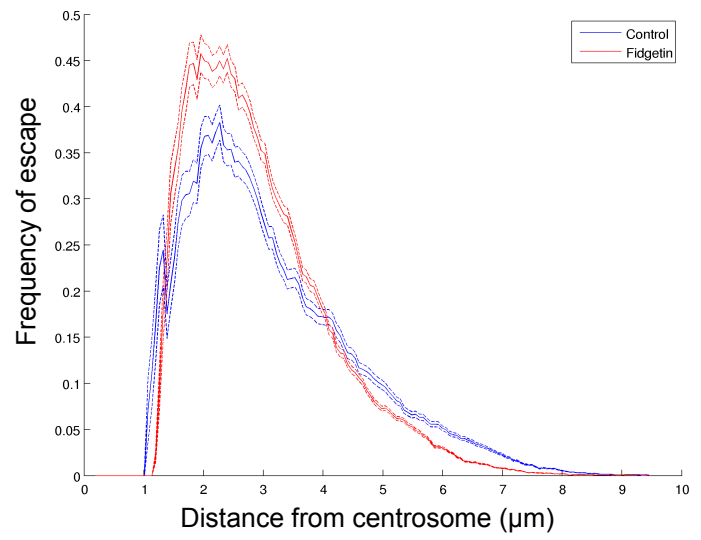

**Figure S1. A point mutation in the Walker A domain of FIGN inhibits its ability to sever and depolymerize MTs.** (A) Coomassie-stained SDS-PAGE gel of the Fidgetin K533A mutant used for the *in vitro* severing assays. (B) Time-series images of the *in vitro* MT severing assays performed in presence of wild type and full-length mutant FIGN. Scale bar 5  $\mu\text{m}$ .

**Figure S2. FIGN's impact on centrosome morphology is MT dependent.** (A) Confocal images of metaphase U2OS cells double labeled for MTs (green) and  $\gamma$ -tubulin (red) after treatment with DMSO (control) or nocodazole (to depolymerize MTs). Scale bar 5  $\mu\text{m}$ . (B) Measurements reveal that the depolymerization of MTs rescues the effects of FIGN depletion on the area (i) and intensity (ii) of centrosome associated  $\gamma$ -tubulin immunofluorescence. The average total intensity of centrosomal  $\gamma$ -tubulin immunofluorescence remains the same in control vs. FIGN siRNA treated cells (iii). The number of cells analyzed is indicated in the bars shown in (i).

**Figure S3. Tracking of EB3-GFP comets within the astral regions of metaphase spindles from control and FIGN siRNA cells.** (A) Maximum intensity projection of the frames from a time series movie of a control metaphase spindle labeled with EB3-GFP. The trajectories of tracked EB3-GFP comets within the astral regions of this spindle are shown as red lines. (B) The probability for a MT growth trajectory initiated within a semi-circular region centered at the centrosome to escape that region (units in  $\mu\text{m}$ ). The dashed lines mark the range of the standard errors.

### **Mov.S1**

Time series movie of the rhodamine-labeled MTs in a glass chamber in the absence of FIGN protein. No changes in MT dynamics were observed. The movie was captured with a TIRF microscope. Images were obtained at 20 second intervals.

### **Mov.S2**

Time series movie showing the severing of rhodamine-labeled MTs incubated with recombinant FIGN and ATP. Images were captured as in Mov.S1.

### **Mov.S3**

Time series movies of the rhodamine-labeled MTs in a glass chamber with 100nM and 200nM mutant FIGN protein respectively. No changes in MT dynamics were observed. The movie was captured in epifluorescence using a Xe-Hg lamp equipped with an electron multiplier CCD Cascade II camera attached to a Nikon Eclipse Ti microscope with a 60X, NA 1.49 objective. Images were obtained at 20 second intervals.

### **Mov.S4**

Anaphase A in a control-treated U2OS cell expressing GFP- $\gamma$ -tubulin and GFP-CENPB. Time series images were captured using a 4D spinning disk confocal microscope with 100X, 1.4NA objective. Each image is a maximum intensity

projection of 1 $\mu$ m Z sections encompassing the entire spindle.

### **Mov.S5**

Anaphase A in a FIGN siRNA-treated U2OS cells expressing GFP  $\gamma$ -tubulin and GFP-CENPB. Imaging was performed as in Mov.S3.

### **Mov.S6**

Tracking of EB3-GFP labeled astral MTs in a control-treated U2OS cell. In the movie on the left, red circles track the movement of astral EB3-GFP comets while the movie on the right is the same spindle without tracking. Images were captured using a 4D spinning disk confocal microscope with 100X, 1.4NA objective. Time in seconds is indicated in each movie frame.
